# Supplementary material for: Sirtinol, a Sir2 protein inhibitor, affects stem cell maintenance and root development in Arabidopsis thaliana by modulating auxin-cytokinin signaling components
Source: PubMed Central journal article supplement (PMC5307962; doi:10.1038/srep42450), 2017-02-14
Supplement: srep42450-s1.pdf [file srep42450-s1.pdf]

**Title:**

**Sirtinol, a Sir2 protein inhibitor, affects stem cell maintenance and root development in *Arabidopsis thaliana* by modulating auxin-cytokinin signaling components.**

**Authors:**

Sharmila Singh<sup>1§</sup>, Alka Singh<sup>1§</sup>, Sandeep Yadav<sup>1§</sup>, Vibhav Gautam<sup>1</sup>, Archita Singh<sup>1</sup> and Ananda K. Sarkar<sup>1\*</sup>

**Supplemental Figures S1-S6 and Table S1, S2**

**Figure S1**

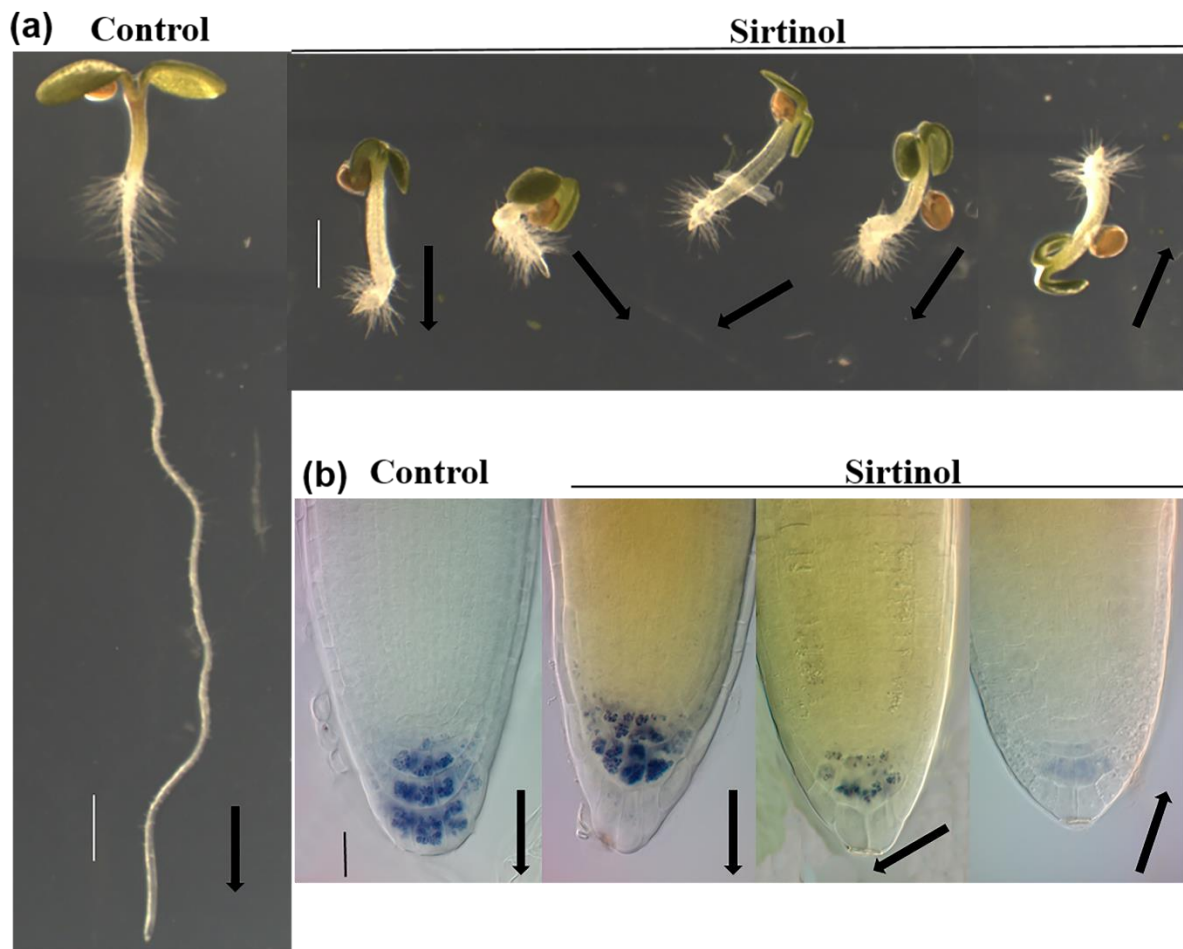

**Fig. S1.** Variation in root growth and gravitropic response upon sirtinol treatment.

(a) Sirtinol treatment affects the gravity response of roots. To analyze this, wild type seeds were germinated and grown on 10  $\mu$ M sirtinol and their response was measured at 2 dag. Scale bar 1 mm.

(b) To check the accumulation of gravity sensing starch granules, wild type seeds were germinated and grown on 10  $\mu$ M sirtinol and at 2 dag lugol staining was performed. Scale bar 10  $\mu$ m. Bold black arrows depict the direction of root growth on a vertically placed control and sirtinol containing half MS media plates.

**Figure S2**

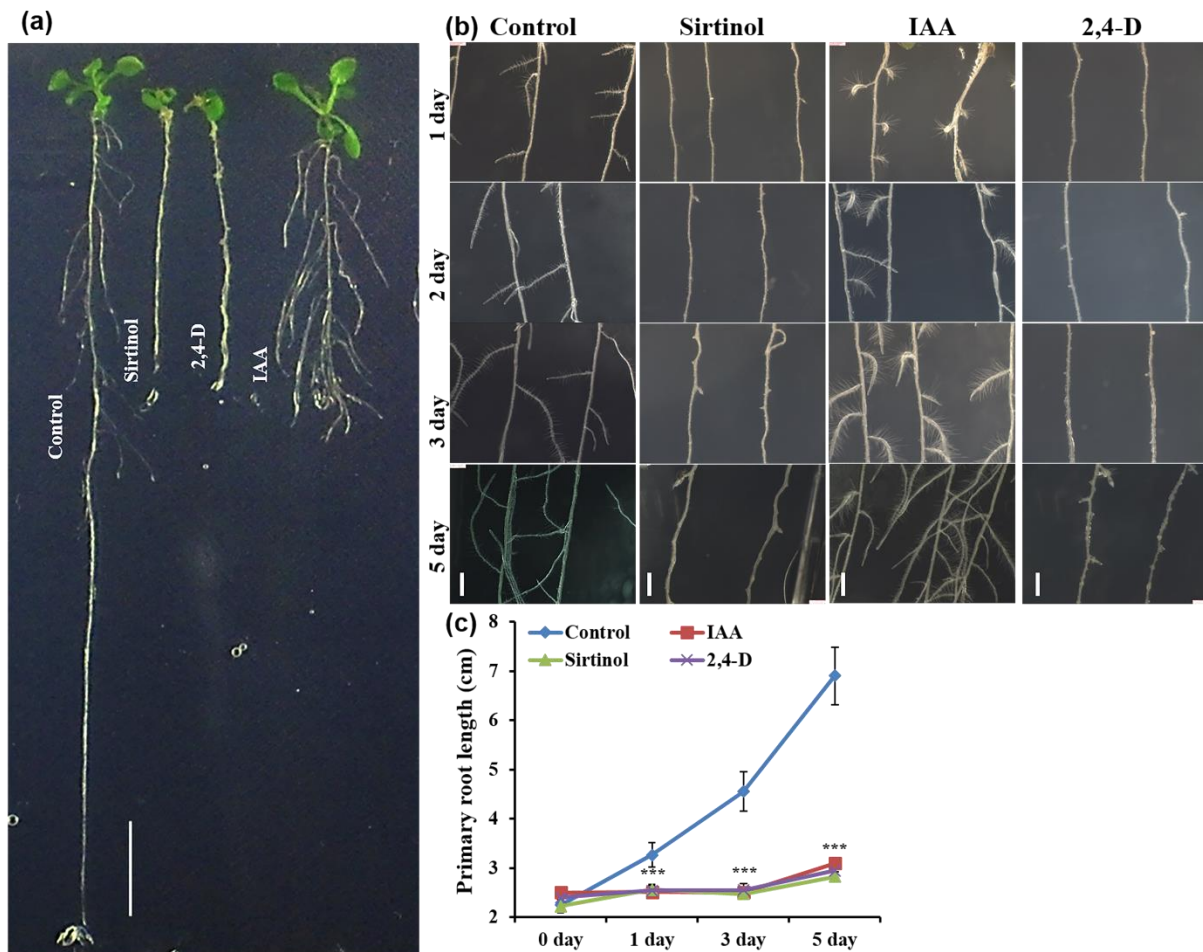

**Fig. S2.** Effect of sirtinol, IAA and 2,4- D on LR development.

(a,c) Sirtinol inhibit primary root growth of wild type, in 2,4-D like manner. To measure root growth, 5 days old wild type seedlings were transferred on sirtinol (5  $\mu$ M), IAA (1 $\mu$ M) and 2,4-D (1 $\mu$ M) medium and root length was measured at 0, 1, 3 and 5 dat. Error bars represent  $\pm$ SD (n=15). One-way ANOVA was performed for statistical analysis. Asterisks indicate significant statistical differences, \*\*\*P<0.001, \*\*P<0.01, \*P<0.05. Experiment was repeated two times with reproducible results (n=15). Scale bar 1cm.

(c) Sirtinol affects LR development of wild type, in a manner different to IAA but similar to 2,4-D. To analyze the LR growth pattern, 5days old wild type seedlings were transferred on sirtinol (5  $\mu$ M), IAA (1 $\mu$ M) and 2,4-D (1 $\mu$ M) containing half MS medium and LR growth was observed at 1, 3 and 5 dat. Scale bar 1mm.

Figure S3

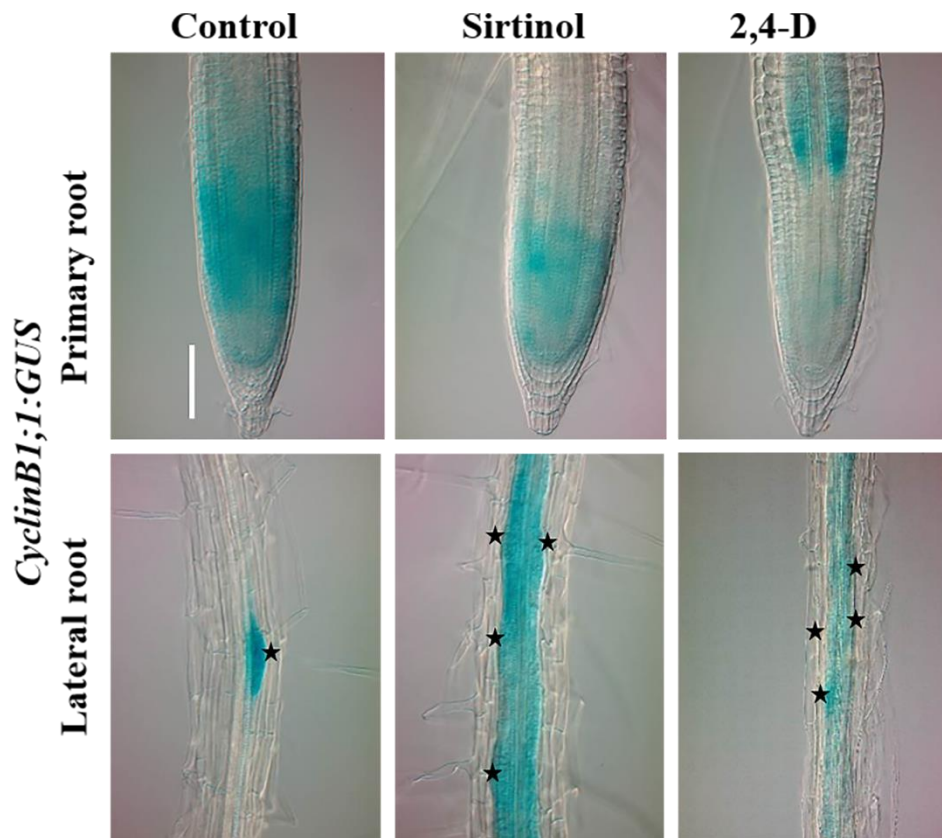

**Fig. S3.** Effect of sirtinol treatment on cell division during LR initiation.

Sirtinol affects LR initiation by modulating cell division in root. To analyze the cell division defect in roots, 5 days old *CyclinB1;1:GUS* seedlings were transferred to half MS, sirtinol (5  $\mu$ M) and 2,4-D (10  $\mu$ M) containing half MS medium plates and GUS staining was performed at 24 hrs of the treatment. Scale bar 50  $\mu$ m. Black stars mark developing LRPs.

Figure S4

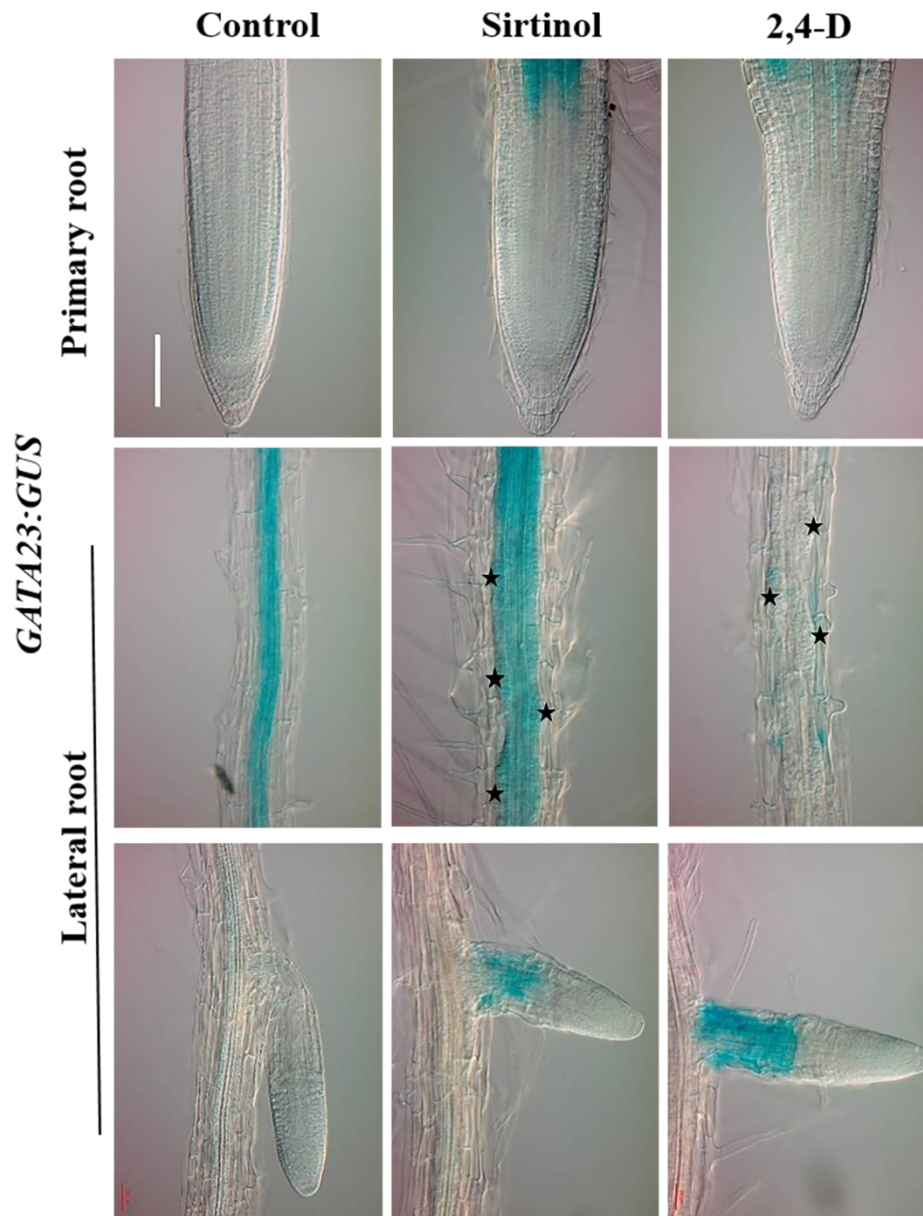

**Fig. S4.** Effect of sirtinol treatment on *GATA23:GUS* expression.

Sirtinol affects LR initiation by modulating cell division in root. To analyze the cell division defect in roots, 5 days old *GATA23:GUS* seedlings were transferred to half MS, sirtinol (5 $\mu$ M) and 2,4-D (10  $\mu$ M) containing half MS medium plates and GUS staining was performed at 24 hrs of the treatment. Scale bar 50  $\mu$ m. Black stars mark developing LRPs.

Figure S5

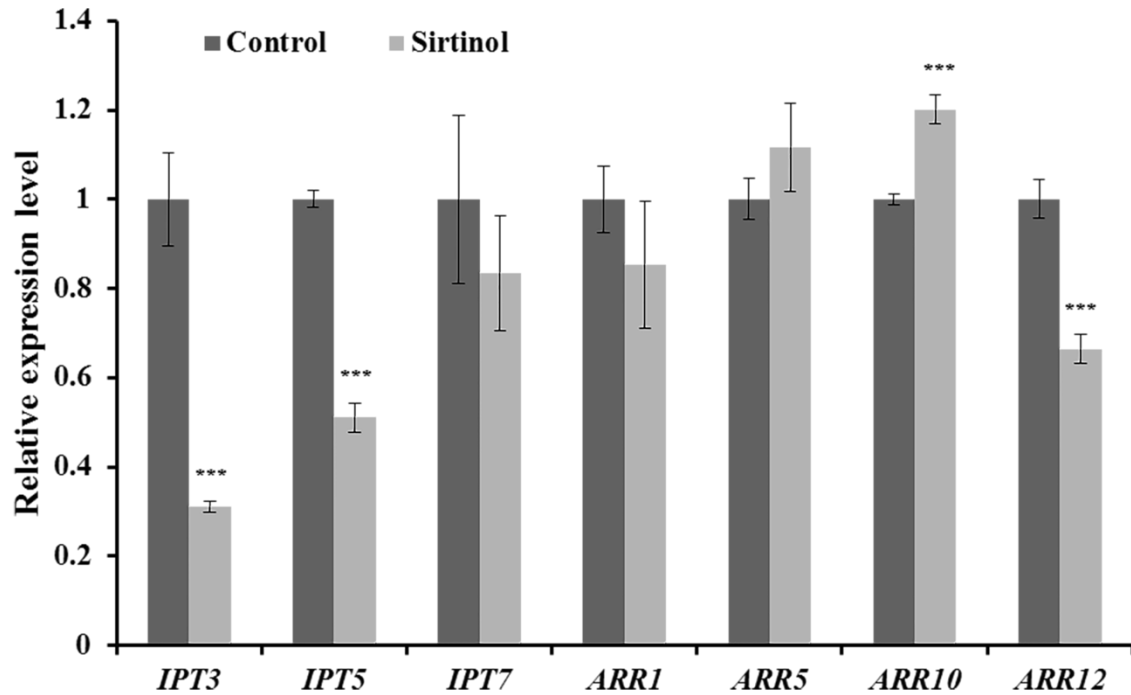

**Fig. S5.** Effect of sirtinol treatment on cytokinin signaling related genes.

Sirtinol affects LR spacing by inhibiting cytokinin biosynthesis and signaling genes. To analyze this, 5 days old wild type seedlings were transferred to half MS and sirtinol (5 $\mu$ M) containing half MS medium plates. Expression level of cytokinin biosynthesis and signaling genes was quantified using real time qRT-PCR after 2 hrs of transfer (only root tissue). Error bars indicate  $\pm$ SE of three independent experiments. One-way ANOVA was performed for for statistical analysis. Asterisks indicate significant statistical differences, \*\*\*P<0.001, \*\*P<0.01, \*P<0.05.

**Figure S6**

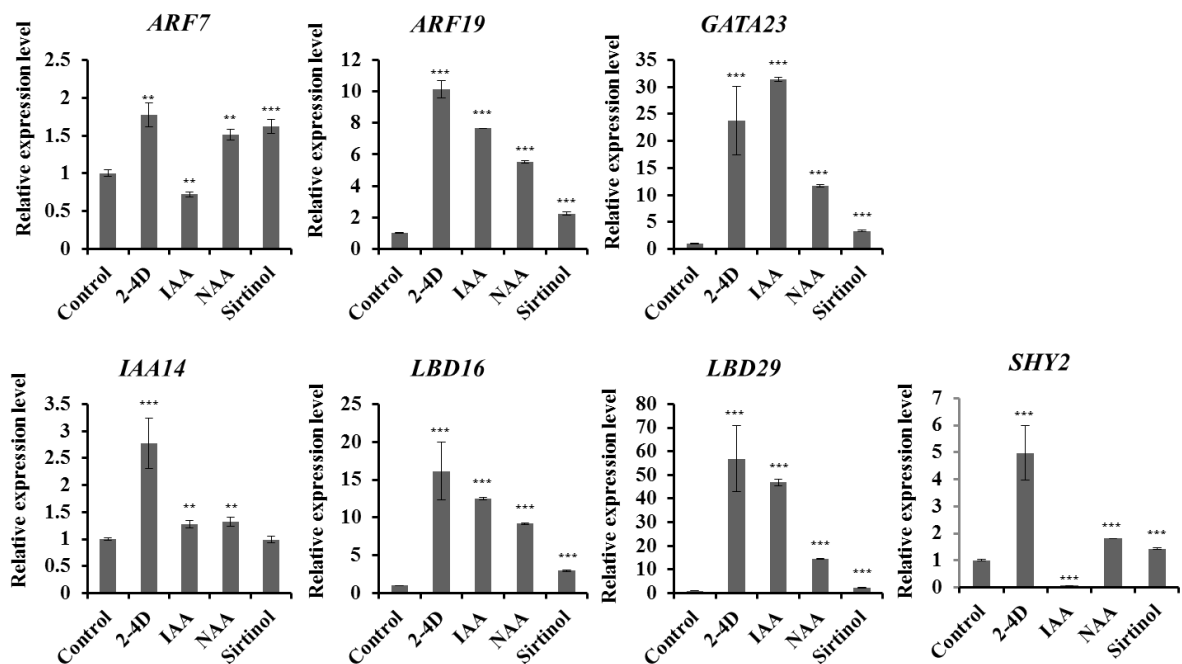

**Fig. S6.** Effect of sirtinol, IAA, 2,-4D and NAA treatment on LR patterning genes.

Sirtinol affects LR initiation and LR spacing. To analyze this 5 days old wild type seedlings were transferred to half MS and sirtinol (5 $\mu$ M), IAA (10 $\mu$ M), NAA (10  $\mu$ M) and 2,4-D (10  $\mu$ M) containing half MS medium plates. Expression level of LR patterning genes was quantified by real time qRT-PCR after 2 h of transfer (only root tissue). Error bars indicate  $\pm$ SE of three independent experiments. One-way ANOVA was performed for statistical analysis. Asterisks indicate significant statistical differences, \*\*\*P<0.001, \*\*P<0.01, \*P<0.05.

**Table S1.** Category of sirtinol treated seedlings.

| <b>S.No.</b> | <b>Category</b>           | <b>% of plants</b> |
|--------------|---------------------------|--------------------|
| <b>i</b>     | <b>Upward</b>             | <b>28.68%</b>      |
| <b>ii</b>    | <b>Horizontal</b>         | <b>30.28%</b>      |
| <b>iii</b>   | <b>Down</b>               | <b>25.58%</b>      |
| <b>iv</b>    | <b>Tilted</b>             | <b>10.85%</b>      |
| <b>v</b>     | <b>Less retarded root</b> | <b>5%</b>          |

**Table S2.** List of primers used in this study.

| <b>S. No.</b> | <b>Primer Name</b> | <b>Sequence</b>           |
|---------------|--------------------|---------------------------|
| 1             | <i>PLT1 F</i>      | TAGCGTCCAATCAAACGATG      |
| 2             | <i>PLT1 R</i>      | CGGATGGTGAAGCTTTGTC       |
| 3             | <i>PLT2 F</i>      | CAACGACAATATCGACAACCC     |
| 4             | <i>PLT2 R</i>      | CGTTGGTTTGATGAATGTCG      |
| 5             | <i>SCR F</i>       | CACCTACTGTATGGGTTGACG     |
| 6             | <i>SCR R</i>       | GAAGAGGAAGGATCAAGGAGC     |
| 7             | <i>SHR F</i>       | CGTGCCTTCTCCGACAAAGAC     |
| 8             | <i>SHR R</i>       | GTCATGCGGTTGAAGAGAGC      |
| 9             | <i>WOX5 F</i>      | GATTGTCAAGAGGAAGAGAAGGTGA |
| 10            | <i>WOX5 R</i>      | AGCTTAATCGAAGATCTAATGGCG  |
| 11            | <i>PIN 1 P</i>     | TCGCTTCAGAGTTCAAGAAACC    |
| 12            | <i>PIN 1 P</i>     | CTCGGAGTAGGACCTTTAGAACC   |
| 13            | <i>PIN 2 F</i>     | CAACAAATCTCACGGCGGAG      |
| 14            | <i>PIN 2 R</i>     | CGTAGCTATTAGTGTAACCGTGACG |
| 15            | <i>PIN 3 F</i>     | CGGGTCTTAACGTTTTTCGG      |
| 16            | <i>PIN 3 R</i>     | TTCTCCTCCGAAATCTCCAC      |
| 17            | <i>PIN 4 F</i>     | TAACACTAACAGTTCTGTTCGG    |
| 18            | <i>PIN 4 R</i>     | CTCTTGCAGTTGCTGTTGG       |
| 19            | <i>PIN 7 F</i>     | CACAAGCTTCGGTGTAATC       |



|    |                 |                            |
|----|-----------------|----------------------------|
| 20 | <i>PIN 7 R</i>  | AAGCAACAAGAGCCCAAATG       |
| 21 | <i>ARF7 F</i>   | GCTCATATGCATGCTCCACA       |
| 22 | <i>ARF7 R</i>   | GCAATGCATCTCTGTTCATATTTG   |
| 23 | <i>ARF19 F</i>  | CACCGATCACGAAAACGATA       |
| 24 | <i>ARF19 R</i>  | TGTTCTGCACGCAGTTCAC        |
| 25 | <i>IAA14 F</i>  | TCCTAGTTACGTGGGAATACG      |
| 26 | <i>IAA14 R</i>  | GGCACATTAGCATGAAGAGG       |
| 27 | <i>GATA23 F</i> | TTTGATGGATCCAAGGAAGC       |
| 28 | <i>GATA23 R</i> | GTCCACCTCTCCACATTGGT       |
| 29 | <i>LBD16 F</i>  | CGTGCGAGAGACTCATCATC       |
| 30 | <i>LBD16 R</i>  | TAAGAGCCAAAGCCTGAAGC       |
| 31 | <i>LBD9 F</i>   | TGTGCAAAGGGATGTGTGTT       |
| 32 | <i>LBD9 R</i>   | CGATCGCTAATGGGAAGATG       |
| 33 | <i>KNAT1 F</i>  | AGTCCCATTCACATCCTCAAC      |
| 34 | <i>KNAT1 R</i>  | ATGGTTCTTGAGTTCCCGATC      |
| 35 | <i>KNAT2 F</i>  | ACCGGAGACAATCAAAGACTG      |
| 36 | <i>KNAT2 R</i>  | TGTAGGTTTGGAGTAAGCGAGG     |
| 37 | <i>WUS F</i>    | GAGTAGCCATGTCTATGGATCTATGG |
| 38 | <i>WUS R</i>    | CCTTCTAGACCAAACAGAGGCT     |
| 39 | <i>CLV3 F</i>   | CTCATGCTCACGTTCAAGGAC      |
| 40 | <i>CLV3 R</i>   | CTTCGTCTTTGCCTTCTCTGC      |
| 41 | <i>ASI F</i>    | GTATGATGCCGTCTTGATGTTG     |
| 42 | <i>ASI R</i>    | CCTTTGTCTACACGTCTTCTCTG    |
| 43 | <i>AS2 F</i>    | AAGACGCAGTGAACCTTTTGG      |
| 44 | <i>AS2 R</i>    | GGCGAGTAAGTTGATGCAAG       |
| 45 | <i>ARR1 F</i>   | CGTCTGGTCTGTTGAATTGC       |
| 46 | <i>ARR1 R</i>   | TCCAAGCCGTCTTAGATATATCC    |
| 47 | <i>ARR5 F</i>   | GCTGCGAGTAGATATCATTAGCTTC  |
| 48 | <i>ARR5 R</i>   | GTTTGGACTGTTGAGCTGC        |
| 49 | <i>ARR12 F</i>  | GTTTGGACTGTTGAGCTGC        |
| 50 | <i>ARR12 R</i>  | ATTAGCCACACCACTGATCC       |
| 51 | <i>SHY2 F</i>   | AGCTGAGGCTGGGATTACC        |
| 52 | <i>SHY2 R</i>   | CAACAATCTGAGCCTTTTCG       |
| 53 | <i>IPT3 F</i>   | GTGGAGGCTCTAGTGGATGAC      |
| 54 | <i>IPT3 R</i>   | TCTCTGACTTCCTCAACCATTCC    |
| 55 | <i>IPT5 F</i>   | CACCGTCCACGACACTTAC        |
| 56 | <i>IPT5 R</i>   | CCGGAAGTCAACGCAATC         |
| 57 | <i>IPT7 F</i>   | CAAGAAGTGGAAGATGTCTATGC    |
| 58 | <i>IPT7 R</i>   | TCCTCCGCCGTAAGATGC         |
| 59 | <i>ACT7 F</i>   | GGTCGTACAACCGGTATTGT       |
| 60 | <i>ACT7 R</i>   | GATAGCATGTGGAAGTGAGAA      |
| 61 | <i>UBQ F</i>    | AAGGTTTCAGCGTTTGAGGAAG     |
| 62 | <i>UBQ R</i>    | GGATCGATCTACCGCTACAACAG    |
